# Supplementary material
Source: PubMed Central journal article supplement (PMC3001006)
Supplement: supp_M110.181073_jbc.M110.181073-1.pdf [file supp_M110.181073_jbc.M110.181073-1.pdf]

**Table S1. Gene ontology classification of differentially expressed genes based on molecular and cellular functions.** The top functional categories enriched in the 3 gene subsets indicated in Figure 4A identified using Ingenuity Pathway Analysis are shown. Significant associations with functional categories were identified using Fisher's exact test at a cutoff p-value of 0.01.

| <b>Gene set i : Genes upregulated in D2 WT cells but unaffected in Myc-GFP<sup>high</sup> cells</b>    |                                                                                                                                                                                                                                                                                                                                                                                                                                                              |
|--------------------------------------------------------------------------------------------------------|--------------------------------------------------------------------------------------------------------------------------------------------------------------------------------------------------------------------------------------------------------------------------------------------------------------------------------------------------------------------------------------------------------------------------------------------------------------|
| <b>Molecular and Cellular functions</b>                                                                | <b>Genes</b>                                                                                                                                                                                                                                                                                                                                                                                                                                                 |
| Cellular Growth and Proliferation                                                                      | MBP, TCIRG1, BCL6, CTSS, OSM, CD274, MXI1, STK17B, MED7 (includes EG:9443), TP53INP1, BTG1, SH3BP2, BMX, STX2, FYB, WWP2, HDAC5, TLR2, BCL2L1, CSF2RB, CD9, NDFIP1, DOK1, PRDX2, B2M, OSR2, CD55, CD74, JAK2, LOC643751, EP300, CDC25B, SLFN1, IGF1, ANXA1, STAT1, TNFRSF10A (includes EG:8797), HGS, IL4, APOBEC1, COL4A3BP, MDM2, STK3, MS12, CSF1R, XPA, ISG15, LY6A, LY96, CAPNS1, GRAP2, KLF5, CDKN1A, BNIP3L, CDKN1B, PAFAH1B1, PRKCB                  |
| Cell Death                                                                                             | DYRK1B, AHSP, PDPK1, BCL6, TNIP1, UBE2B, CTSS, PPP1R13B, OSM, CD274, GPX4, STK17B, MED7 (includes EG:9443), SHISA5, TP53INP1, DNASE2, DDIT4, ASAH1, WWP2, TLR2, BCL2L1, CD9, STRADB, USE1, ALDOA, HIST1H1C, USP18, ZFP36, JAK2, EP300, CDC25B, IGF1, AKT3, MAP1LC3B, STAT1, TNFRSF10A (includes EG:8797), IL4, MDM2, STK3, AXL, SOAT1, NFE2L1, XPA, LY6A, ROCK1, PGLYRP1, ATP6AP2, GNAS, LAMP2, CAPNS1, GRAP2, CDKN1A, KLF5, BNIP3L, CDKN1B, PAFAH1B1, PRKCB |
| Cell Cycle                                                                                             | JAK2, BCL6, LOC643751, EP300, CDC25B, SLFN1, IGF1, ANXA1, DSTN, OSM, CD274, STAT1, MXI1, IL4, TP53INP1, SH3BP2, MDM2, STX2, CSF1R, XPA, FZR1, GNAS, BCL2L1, CCNG2, CDKN1A, CDKN1B                                                                                                                                                                                                                                                                            |
| Cellular Development                                                                                   | B2M, HIST1H1C, ZFP36, AHSP, MBP, CD55, PDPK1, CD74, JAK2, BCL6, LOC643751, IDH1, EP300, TOP1, SLFN1, IGF1, UBE2B, OSM, STAT1, HGS, STK17B, IL4, MED7 (includes EG:9443), DNASE2, AP3D1, SCD2, MDM2, STX2, AXL, CSF1R, WWP2, TLR2, LY6A, BCL2L1, GNAS, CAPNS1, CD9, GRAP2, CDKN1A, ADD1, CDKN1B, PRKCB, PRDX2                                                                                                                                                 |
| Molecular Transport                                                                                    | B2M, ASPSCR1, AHSP, HEXA, PDPK1, CD74, SLC2A3, IDH1, RFFL, USO1, ANXA1, AP2M1, AP3D1, RAB10, SOAT1, CSF1R, NFE2L1, CHIC2, TLR2, UROD, CSF2RB, ARF5, FABP5, USE1, CDKN1A, SLC6A4, CDKN1B, SLC11A1, PRDX2                                                                                                                                                                                                                                                      |
| Protein Trafficking                                                                                    | USO1, AP2M1, ASPSCR1, ARF5, AP3D1, USE1, RAB10, CD74, SOAT1, CHIC2, RFFL                                                                                                                                                                                                                                                                                                                                                                                     |
| Cellular Movement                                                                                      | TCIRG1, CD55, LOC643751, AXL, CSF1R, TLR2, ROCK1, CSF2RB, IGF1, NDEL1, OSM, PAFAH1B1, IL4                                                                                                                                                                                                                                                                                                                                                                    |
| Cell Morphology                                                                                        | ATG12, ULK1, AHSP, PDPK1, HBP1, LOC643751, PSME3, ISG15, ROCK1, TLR2, BCL2L1, ST5, CAPNS1, IGF1, STRADB, ANXA1, CDKN1A, IRGM, CDKN1B, PAFAH1B1, HGS, STK17B, IL4, PRDX2                                                                                                                                                                                                                                                                                      |
| <b>Gene set ii : Genes unchanged in D2 WT cells but perturbed in Myc-GFP<sup>low</sup> cells</b>       |                                                                                                                                                                                                                                                                                                                                                                                                                                                              |
| <b>Molecular and Cellular Functions</b>                                                                | <b>Genes</b>                                                                                                                                                                                                                                                                                                                                                                                                                                                 |
| Cell-To-Cell Signaling and Interaction                                                                 | SELL, ADRBK1, ELANE, PRF1, SPHK2, PIK3CG, ATG5 (includes EG:9474), PTPN6, PTPRE, TIAM1, MIF, PSMB5, PLEC1, IFNGR1, IRF1, F2RL3, PRDX3, GP5, PRTN3, LAT, CLCN7, GPIIB, ELMO1, AOC3, ITGA2B (includes EG:3674), F2RL2, PSMB10, CTNNA1, P2RX1, MFGE8, BECN1, OGT, RASSF5, CASP8, MAPKAPK2, CALR, RAB21, FCGR2A, VWF, VIM, ALS2, SELPLG, CCL9, CEBPE, PSME1, MAPK14, SWAP70, CORO1A, CD44, AP3B1, PIK3CB                                                         |
| Cellular Movement                                                                                      | GBX2, AOC3, RAF1, ITGA2B (includes EG:3674), SELL, PLCB2, ADRBK1, ELANE, PDPK1, TGFBR2, PRF1, ST8SIA4, SPHK2, PIK3CG, IRS2, RASSF5, GSK3B, MAPKAPK2, FRS2, CALR, TIMP3, PTPN6, TIAM1, RAB21, FCGR2A, PLEC1, IFNGR1, BAX, SELPLG, CEBPE, IL16, SWAP70, MAPK14, CYTIP, PRTN3, MYL12B, PPIA (includes EG:268373), CORO1A, ARHGFE6, CD44, PIK3CB                                                                                                                 |
| Cellular Function and Maintenance                                                                      | CTNNA1, ELANE, MFGE8, IKZF1, BECN1, RICTOR, DEF6, TGFBR2, PRF1, PIK3CG, IRS2, MAPKAPK2, CASP8, ATG5, CALR, FCGR2A, IFNGR1, BAX, IER3, HSPA2, MLST8, IRF1, CEBPE, MAPK14, ST3GAL1, LAT, CORO1A, CD44, AP3B1, PIK3CB, ELMO1, LGALS1                                                                                                                                                                                                                            |
| Cellular Development                                                                                   | PHC2, ELANE, IKZF1, DEF6, TGFBR2, GPC1, PRF1, PIK3CG, ATF4, ARID3A, CASP8, HIPK2, TIAM1, IFNGR1, BAX, IER3, HSPA2, CEBPE, MAPK14, ST3GAL1, LAT, CD44, AP3B1, PML, LGALS1                                                                                                                                                                                                                                                                                     |
| Carbohydrate Metabolism                                                                                | F2RL2, MECP2, GM2A, H6PD, PIP4K2B, GCLC, PFKL, TPII, F2RL3, MAPK14, HK2, CHKA, IRS2                                                                                                                                                                                                                                                                                                                                                                          |
| Cell Cycle                                                                                             | MIF, PHC2, BAX, BECN1, GRB10, GPC1, MAPK14, SPHK2, XPC, ARID3A, RASSF5, POLK, PML, PLAC8                                                                                                                                                                                                                                                                                                                                                                     |
| Molecular Transport                                                                                    | F2RL2, FCGR2A, RAB2A, P2RX1, F2RL3, TMED10, GLB1, AP3B1, SGPP1, CHMP5, GSK3B, SLC19A2, NAPA, PPP3CA                                                                                                                                                                                                                                                                                                                                                          |
| Small Molecule Biochemistry                                                                            | F2RL2, PDIA3, FCGR2A, GM2A, P2RX1, H6PD, GCLC, GNAZ, PFKL, BAX, F2RL3, PRDX3, SPHK2, GLB1, PIK3CG, PAPSS1 (includes EG:9061), PAOX (includes EG:196743), NCOR1, IRS2, SGPP1, SLC19A2, HSD17B4, AIFM1                                                                                                                                                                                                                                                         |
| <b>Gene set iii : Genes downregulated in D2 WT cells but unchanged in Myc-GFP<sup>high</sup> cells</b> |                                                                                                                                                                                                                                                                                                                                                                                                                                                              |
| <b>Molecular and Cellular Functions</b>                                                                | <b>Genes</b>                                                                                                                                                                                                                                                                                                                                                                                                                                                 |
| Gene Expression                                                                                        | NARG1, YWHAE, NPM3, CD3EAP, TCOF1, POLR1E, HMGAI, HMGNI, PARP1                                                                                                                                                                                                                                                                                                                                                                                               |
| RNA Post-Transcriptional Modification                                                                  | QTRT1, NPM1 (includes EG:18148), SRPK1, BOP1, NPM3, WDR55, SFRS13A, IMP4, RSRC1                                                                                                                                                                                                                                                                                                                                                                              |
| Cell Death                                                                                             | CLNS1A, SMN1, PRPF19, DUSP1, TRIM28, HSF1, HMGAI, KRT10, NDN, PARP1, AIFM1                                                                                                                                                                                                                                                                                                                                                                                   |
| Cellular Assembly and Organization                                                                     | NPM1 (includes EG:18148), C14ORF169, HDAC2, AATF, HSF1, ABCA3, SRF, RBBP7, RANBP1, HMGNI, TPP2, SKP2, PARP1, PES1, BOP1, TFAM, SFRS13A, KIF11, RTEL1                                                                                                                                                                                                                                                                                                         |
| DNA Replication, Recombination, and Repair                                                             | MCM6, C14ORF169, HDAC2, HSF1, RBBP7, PSMC3IP, RAD54L, HMGNI, POLD1, TPP2, MCM4, SKP2, PARP1, MND1, QTRT1, PRMT7, TFAM, XRCC6, HUS1, MSH6, KIF11, RTEL1, UNG, MCM7                                                                                                                                                                                                                                                                                            |
| Cell Cycle                                                                                             | C14ORF169, HDAC2, COX10, HSF1, RBBP7, PSMC3IP, DDX3X, RANBP1, HMGNI, SKP2, PARP1, MYBL2, PPP5C, KIF11                                                                                                                                                                                                                                                                                                                                                        |
| Cellular Compromise                                                                                    | PPID, SMN1, EXT2, HSF1, MEF2C, SMARCC1, UNG, PARP1                                                                                                                                                                                                                                                                                                                                                                                                           |
| Post-Translational Modification                                                                        | HSPA8, PDSS1, PFDN2, HSP90AA1                                                                                                                                                                                                                                                                                                                                                                                                                                |

**Table S2. qRT-PCR Primer sequences.** Primers sequences were obtained from PrimerBank website<sup>1,2</sup> (<http://pga.mgh.harvard.edu/primerbank>) or previous studies<sup>3</sup>, or were designed using Primer Express 3.0 software (Applied Biosystems).

| Gene               | Sense primer            | Antisense primer        |
|--------------------|-------------------------|-------------------------|
| Hbb-b1             | GCACCTGACTGATGCTGAGAA   | TTCATCGGCGTTCACCTTCC    |
| Hbb-b2             | GCACCTGACTGATGCTGAGAA   | ACTTCATCGGGTTCACCTTT    |
| Hba-a1             | CACCACCAAGACCTACTTTCC   | CAGTGGCTCAGGAGCTTGA     |
| Spna1              | AGAAATCCAACACCGAAGAGC   | TCCAGGTCATCTGCGTCTCTC   |
| GypA               | ACTGTAGGTAACCCAAATCAGCA | GGAAAATCGTGTTGCACTTCAG  |
| GATA1              | TGGGGACCTCAGAACCCTTG    | GGCTGCATTTGGGGAAGTG     |
| Prkcd              | TGGGGGTGACCTGATGTTC     | CCAGCACCAACAATACCTGTAA  |
| Jak2               | TTGTGGTATTACGCCTGTGTATC | ATGCCTGGTTGACTCGTCTAT   |
| Akt3               | TGGGTCAGAAAGAGGGGAGAA   | AGGGGATAAGGTAAGTCCACATC |
| Bcl-X <sub>L</sub> | GACAAGGAGATGCAGGTATTGG  | TCCCGTAGAGATCCACAAAAGT  |
| Rac2               | GACAGTAAGCCGGTGAACCTG   | CTGACTAGCGAGAAGCAGATG   |
| Ceng2              | CCCCGGAGAATGATAACACTTT  | CCACTTTGGCATTTCTCAGTCT  |
| ccne1              | GTGGCTCCGACCTTTCAGTC    | CACAGTCTTGTCAATCTTGGCA  |
| cdc25a             | ACAGCAGTCTACAGAGAATGGG  | GATGAGGTGAAAGGTGTCTTGG  |
| Hras               | CGTGAGATTCGGCAGCATAAA   | GACAGCACACATTTGCAGCTC   |
| Ebp1               | CAGCAGGAGCAAACCTATCGC   | GGCATCACCTTTCTCACACAAG  |
| p27                | TGCCTCCTGAGTGCTGAGATT   | AGTACCCAGAGGTGATGGCACA  |
| CBP                | GGCTTCTCCGCAATGACAA     | GTTTGGACGCAGCATCTGGA    |
| Elp3               | CAGTCCCTCCTCACTATCGAA   | TCTGTGGGGTTTGCACATCAC   |
| p300               | CAGAACCAGCAGATGCTCAA    | GAGGTGCTTGGCTGTTCTTC    |
| GCN5               | AAGGCCAATGAAACCTGCAAG   | CTCACAGCTACGGCACAACCTC  |
| Hat1               | AAGTGTAACACCAACACAGCA   | CGAAAGCAGTTTCATCATCCCC  |
| PCAF               | CGGATCGCCGTGAAGAAGG     | CATTGCATTTACAGGACTCCTCT |
| Tip60              | CGAGCGGCTGGACTTAAAGAA   | GGGCGGGACCCAGGAA        |
| Hdac1              | GGTCTCTACCGAAAAATGGAGA  | TCATCACTGTGGTACTTGGTCA  |
| Hdac2              | CTCCACGGGTGGTTCAGT      | CCCAATTGACAGCCATATCA    |
| Hdac3              | TCAACGTGGGTGATGACTG     | TGTTGCTCCTTGCAGAGATG    |
| Hdac4              | AATCCTGCCCGTGTGAAC      | GTAGGGGCCACTTGCAGA      |
| Hdac5              | GAGTCCAGTGCTGGTTACAAAA  | TACACCTGGAGGGGCTGTAA    |
| Hdac6              | GAAGGAGGAGCTGATGTTGG    | TCATGTACTGGGTGTCTCCAT   |
| Hdac8              | GCAGCTGGCAACTCTGATT     | GTCAAGTATGTCCAGCAACGAG  |
| Hdac10             | CGACTGCTCTGGGATGACCC    | CAGGCACCTTTCTTCCAGGC    |

**ChIP qRT-PCR primer sequences:**

| Binding site relative to <i>Gen5</i> TSS | Sense primer          | Antisense primer     |
|------------------------------------------|-----------------------|----------------------|
| -1596 to -1690                           | CACTCTACCAGTGAGGCTGCT | AGCGAAACCTTGGGCATC   |
| -44 to -142                              | CGATGGGAGTCGTAGTCTTCC | GCTCAACCAAGCGACATTTG |
| -3 to -96                                | GCAACCGGCGCACAG       | GTATGGAAGGCCAAAGGATG |

### **Supplementary References:**

1. Spandidos A, Wang X, Wang H, Dragnev S, Thurber T, Seed B. A comprehensive collection of experimentally validated primers for Polymerase Chain Reaction quantitation of murine transcript abundance. *BMC Genomics*. 2008;9:633.
2. Wang X, Seed B. A PCR primer bank for quantitative gene expression analysis. *Nucleic Acids Res*. 2003;31:e154.
3. Popova EY, Krauss SW, Short SA, et al. Chromatin condensation in terminally differentiating mouse erythroblasts does not involve special architectural proteins but depends on histone deacetylation. *Chromosome Res*. 2009;17:47-64.
